# Supplementary material
Source: PubMed Central journal article supplement (PMC5544076)
Supplement: tpmd160731.SD1.pdf [file tpmd160731.SD1.pdf]

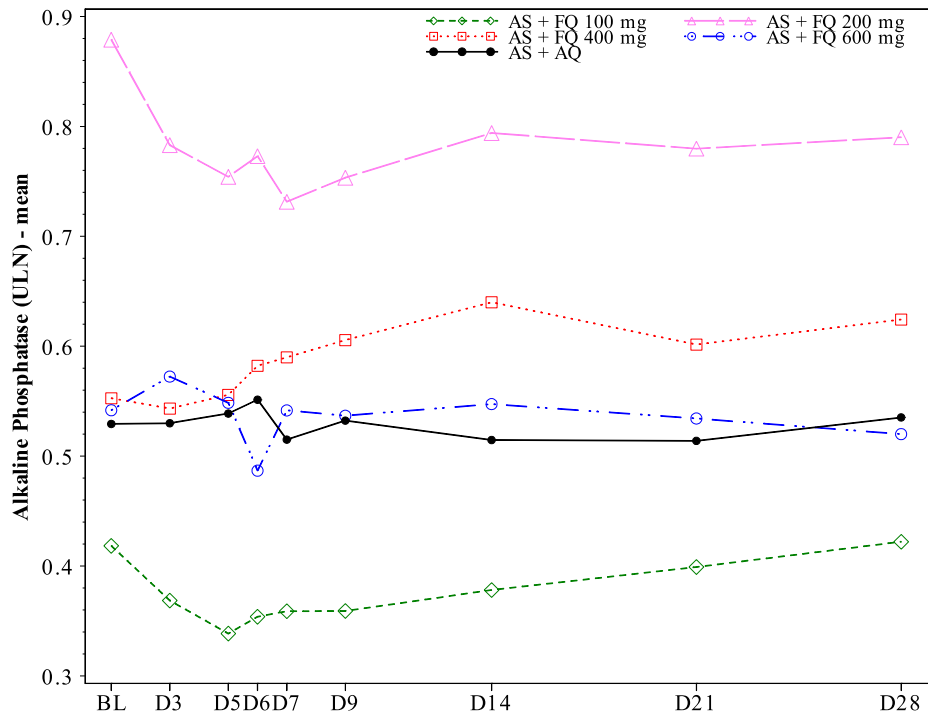

SUPPLEMENTAL FIGURE 1. Mean change from baseline in alanine aminotransferase (ALP) (upper limit of normal [ULN] values) by visit and by treatment. The 200-mg ferroquine group had the highest mean baseline value, paralleling the highest on treatment values.

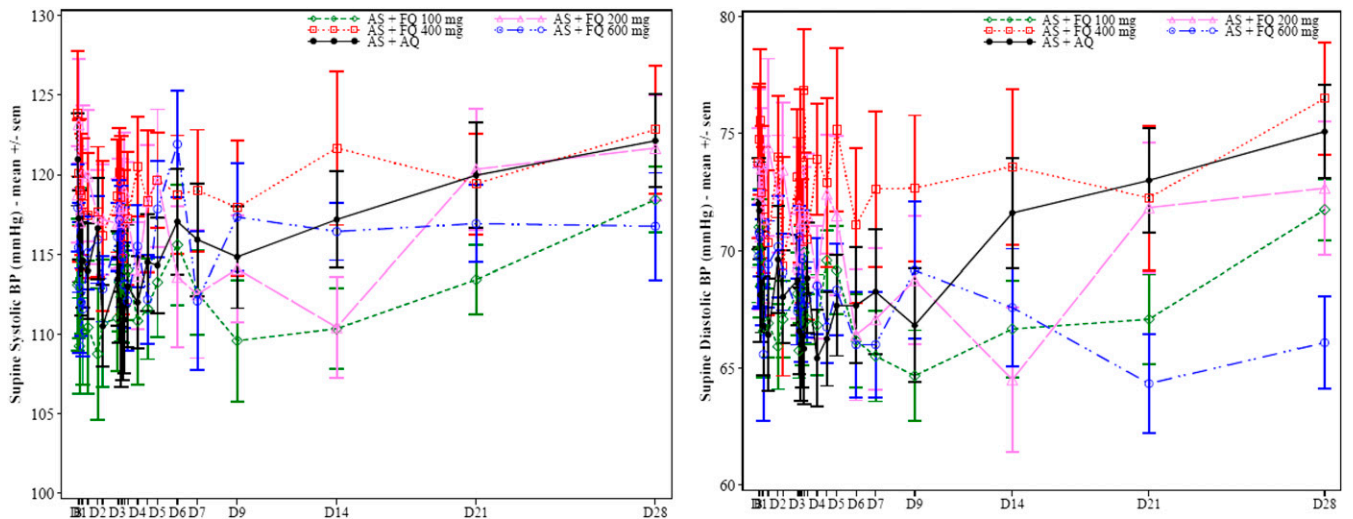

SUPPLEMENTAL FIGURE 2. Days 0–28, supine systolic and diastolic blood pressures.
